# Supplementary material
Source: PubMed Central journal article supplement (PMC3466379)
Supplement: NIHMS401773-supplement-1.pdf [file NIHMS401773-supplement-1.pdf]

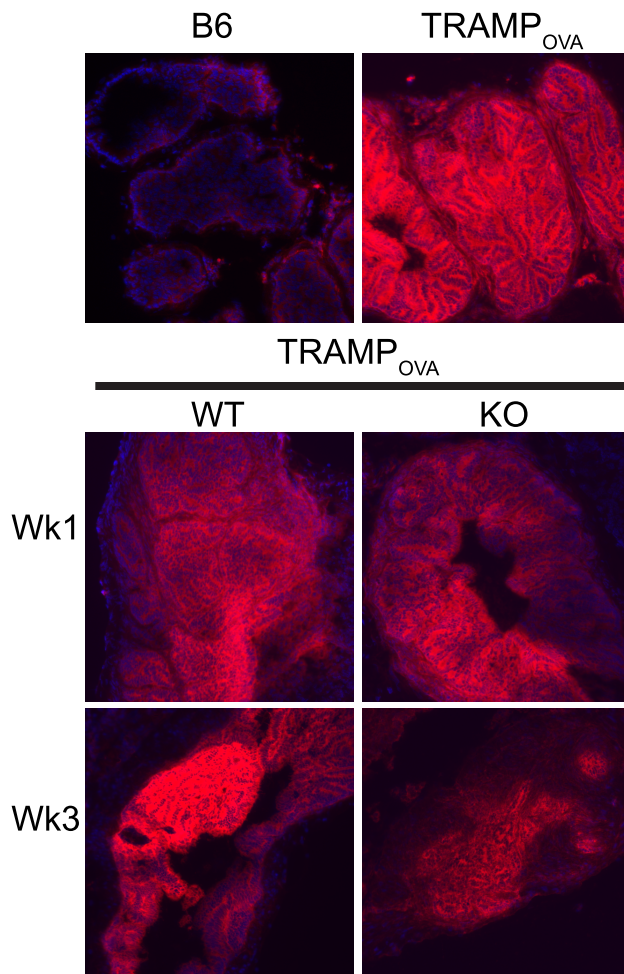

**Supplementary Figure 1: TRAMP prostate tumors express MHC Class I and maintain Class I expression following adoptive T cell transfer.** Prostates were harvested from B6 mice and TRAMP<sub>OVA</sub> mice (pre-adoptive transfer and at week 1 and week 3 post adoptive transfer of TGF $\beta$ RII KO or WT cells), and frozen in OCT. Frozen prostate sections were stained with DAPI (blue) and anti-MHC Class I mAb (red).
